# Supplementary material for: Limb Bone Structural Proportions and Locomotor Behavior in A.L. 288-1 ("Lucy")
Source: PLoS One. 2016 Nov 30;11(11):e0166095. doi: 10.1371/journal.pone.0166095 (PMC5130205; doi:10.1371/journal.pone.0166095)
Supplement: S1 Table — (XLSX) [file pone.0166095.s003.xlsx]

## Sheet: Sheet1
S1 Table. CT scan parameters for A.L. 288-1.
Element	kV	mA	focal spot size (mm)	views	slices per rotation	seconds per view	SOD (mm)	slice spacing (mm)	pixel spacing (mm)	recon offset	recon scale	BHC parameters	ring processing	sections for this study	Oblique slice (degrees)
mI	180	0.175	0.04	1200	25	0.533 (slices 1-650); 0.133 (slices 651-2982)	144	0.05022	0.0458984	5000	500	[0, 0.75, 0.05, 0.05]	pre	40%, 50%, 65%, 80%	2.32188
mII+s	180	0.175	0.04	1200	25	0.400 (slices 1-675); 0.133 (slices 676-1408)	192	0.06696	0.0615234	5000	3000	[0, 0.6, 0.05, 0.05]	post	20%, 35% (m), 20% (s)	4.9 (m), 3.6 (s)
r	180	0.175	0.04	1200	25	0.533 (slices 1-650); 0.133 (slices 651-2775)	114	0.03976	0.0361328	5000	3000	[0, 0.7, 0.15]	post	0.8	5.48995
apI	180	0.18	0.04	1200	25	0.400 (slices 1-749); 0.133 (slices 750-1263)	210	0.07323	0.0673828	5000	3000	[0, 0.5, 0.01, 0.1]	post	20%, neck	0, 52.9 (neck)
apII	180	0.175	0.04	1200	25	0.267 (slices 1-450); 0.133 (slices 451-1231)	192	0.06696	0.0615234	5000	3000	[0, 0.6, 0.05, 0.05]	post	65%, 80%	0
apIII	180	0.175	0.04	1200	25	0.533 (slices 1-828)	190	0.06626	0.0615234	5000	500	[0, 0.6, 0.05, 0.05]	post
apIV	180	0.175	0.04	1200	25	0.133 (slices 1-1633)	210	0.07323	0.0673828	5000	3000	[0, 0.6, 0.05, 0.05]	none	35%, 50%	8.82931
